# Supplementary material for: KIT ligand protects against both light-induced and genetic photoreceptor degeneration
Source: eLife. 2020 Apr 3;9:e51698. doi: 10.7554/eLife.51698 (PMC7170656; doi:10.7554/eLife.51698)
Supplement: Figure 1—figure supplement 1—source data 1. [file elife-51698-fig1-figsupp1-data1.xlsx]

## Sheet: Source data 1
Figure 1-figure supplement 1-source data 1
These data were used to generate the graphs in figure 1-figure supplement 1 B.
Each raw represents one eye
Mice	Light condition	Outer nuclear layer	Distance from optical nerve head (μm)
			Inferior									Superior
			800	700	600	500	400	300	200	100	0	100	200	300	400	500	600	700	800
Albino	LD 0 day	Thickness (μm)	51	53	51	52	50	49	41	28	0	19	36	43	41	45	45	43	39
			48	51	53	52	51	48	39	26	0	21	33	40	42	46	43	42	41
			43	47	50	54	48	46	42	22	0	18	34	42	51	53	42	41	42
			49	50	50	51	50	45	42	29	0	21	33	41	43	45	46	45	43
		Average	47.75	50.25	51	52.25	49.75	47	41	26.25	0	19.75	34	41.5	44.25	47.25	44	42.75	41.25
		SD	3.40343	2.5	1.41421	1.25831	1.25831	1.82574	1.41421	3.0957	0	1.5	1.41421	1.29099	4.57347	3.86221	1.82574	1.70783	1.70783
	LD 1 day	Thickness (μm)	49	52	52	50	51	46	42	25	0	19	32	42	45	46	44	43	40
			49	50	51	51	49	48	38	23	0	18	33	41	45	45	43	41	42
			43	46	48	51	48	45	40	28	0	20	33	39	43	45	44	43	42
			48	52	52	53	50	47	42	29	0	23	36	39	42	43	45	45	43
		Average	47.25	50	50.75	51.25	49.5	46.5	40.5	26.25	0	20	33.5	40.25	43.75	44.75	44	43	41.75
		SD	2.87228	2.82843	1.89297	1.25831	1.29099	1.29099	1.91485	2.75379	0	2.16025	1.73205	1.5	1.5	1.25831	0.816497	1.63299	1.25831
	LD 3 days	Thickness (μm)	29	29	27	29	28	29	28	15	0	15	19	20	24	21	20	15	20
			24	21	26	24	30	28	26	23	0	20	25	22	23	24	22	23	22
			23	23	24	28	29	31	25	19	0	17	22	22	24	23	22	23	24
			26	27	26	25	27	28	25	13	0	18	24	23	25	23	23	21	23
		Average	25.5	25	25.75	26.5	28.5	29	26	17.5	0	17.5	22.5	21.75	24	22.75	21.75	20.5	22.25
		SD	2.64575	3.65148	1.25831	2.38048	1.29099	1.41421	1.41421	4.43471	0	2.08167	2.64575	1.25831	0.816497	1.25831	1.25831	3.78594	1.70783
