# Supplementary material for: KIT ligand protects against both light-induced and genetic photoreceptor degeneration
Source: eLife. 2020 Apr 3;9:e51698. doi: 10.7554/eLife.51698 (PMC7170656; doi:10.7554/eLife.51698)
Supplement: Figure 2—source data 1. [file elife-51698-fig2-data1.xlsx]

## Sheet: Tabelle1
Figure 2 - Source Data 1
These data were used to generate the graphs in figure 2.
Each raw represents one eye
strain /condition	Scotopic condition (Flash light intensity at -5 log scotopic candela-sec/m2)		Photopic condition (Light stimulation at the intensity of 3.0 cd. s/m2)	Genotype
	a wave (μV)	b wave (μV)	b wave (μV)
Normal light	448	755	109	Kit+/+
	421	892	144	Kit+/+
	369	957	126	Kit+/+
	316	840	96	Kit+/+
	485	870	98	Kit+/+
Normal light	357	743	116	KitWps/Wps
	457	940	143	KitWps/Wps
	352	836	79	KitWps/Wps
	316	925	75	KitWps/Wps
	398	790	70	KitWps/Wps
