# Supplementary material for: KIT ligand protects against both light-induced and genetic photoreceptor degeneration
Source: eLife. 2020 Apr 3;9:e51698. doi: 10.7554/eLife.51698 (PMC7170656; doi:10.7554/eLife.51698)
Supplement: Figure 3—source data 1. [file elife-51698-fig3-data1.xlsx]

## Sheet: Figure 3-source data 1
Figure 3 - Source Data 1
These data were used to generate the graphs in figure 3 C, D.
Each raw represents one eye
strain /condition	Scotopic condition (Flash light intensity at -5 log scotopic candela-sec/m2)		Photopic condition (Light stimulation at the intensity of 3.0 cd. s/m2)	Genotype
	a wave (μV)	b wave (μV)	b wave (μV)
Normal light	368	754	96	Kit+/+
	417	821	112
	432	964	98
	347	742	78
	521	846	86
	398	789	83
	441	832	114
	481	953	92
	477	645	88	KitWps/Wps
	392	759	71
	406	841	76
	487	1001	86
	512	894	92
	433	932	104
	386	946	82
	423	893	116
High-intensity light (LD)	316	546	67	Kit+/+
	284	642	72
	266	432	55
	253	464	46
	324	552	53
	352	614	62
	312	492	66
	246	433	71
	168	324	32	KitWps/Wps
	212	372	27
	142	412	53
	169	256	42
	206	445	31
	188	432	46
	196	327	37
	224	356	53

## Sheet: Figure 3-source data 2
Figure 3-source data 2
These data were used to generate the graphs in figure 3 F.
Each raw represents one eye
Light Condition	Genotype	Outer nuclear layer	Distance from optical nerve head (μm)
			Inferior									Superior
			800	700	600	500	400	300	200	100	0	100	200	300	400	500	600	700	800
Normal light (NL)	Kit+/+	Thickness (μm)	44	44	44	44	40	48	44	32	0	28	36	40	48	36	40	40	36
			47	48	47	45	46	49	47	28	0	22	34	45	51	45	43	42	38
			42	52	51	48	48	48	43	31	0	24	36	43	48	46	42	41	41
			48	41	42	52	49	46	39	27	0	21	38	46	45	47	42	43	44
			43	46	49	51	49	52	41	29	0	24	34	42	46	48	47	45	44
		Average	44.8	46.2	46.6	48	46.4	48.6	42.8	29.4	0	23.8	35.6	43.2	47.6	44.4	42.8	42.2	40.6
		SD	2.58844	4.14729	3.64692	3.53553	3.78153	2.19089	3.03315	2.07364	0	2.68328	1.67332	2.38747	2.30217	4.82701	2.58844	1.92354	3.57771
	KitWps/Wps	Thickness (μm)	44	44	48	48	48	48	40	28	0	32	44	44	44	44	48	44	44
			46	48	51	51	51	52	38	22	0	28	46	47	45	46	47	42	39
			41	47	50	51	51	51	42	25	0	27	41	45	47	47	46	41	41
			44	49	51	51	52	48	41	32	0	31	47	47	46	45	47	43	40
			43	47	52	51	50	51	36	29	0	23	43	45	46	42	46	43	40
		Average	43.6	47	50.4	50.4	50.4	50	39.4	27.2	0	28.2	44.2	45.6	45.6	44.8	46.8	42.6	40.8
		SD	1.81659	1.87083	1.51658	1.34164	1.51658	1.87083	2.40832	3.83406	0	3.56371	2.38747	1.34164	1.14018	1.92354	0.83666	1.14018	1.92354
High-intensity light (LD)	Kit+/+	Thickness (μm)	40	44	40	40	44	40	40	20	0	24	36	32	36	36	36	36	32
			38	41	42	43	42	38	39	25	0	22	34	33	35	37	34	37	34
			41	44	41	42	41	39	37	28	0	25	32	35	37	34	36	38	33
			40	39	41	43	42	41	36	29	0	27	32	34	35	37	37	35	34
			39	42	43	42	41	42	38	27	0	28	35	32	38	38	36	35	32
		Average	39.6	42	41.4	42	42	40	38	25.8	0	25.2	33.8	33.2	36.2	36.4	35.8	36.2	33
		SD	1.14018	2.12132	1.14018	1.22474	1.22474	1.58114	1.58114	3.56371	0	2.38747	1.78885	1.30384	1.30384	1.51658	1.09545	1.30384	1
	KitWps/Wps	Thickness (μm)	36	36	32	36	32	32	24	12	0	4	12	16	20	20	20	28	32
			34	31	32	33	29	28	26	14	0	14	23	25	24	24	23	26	31
			33	35	31	30	34	31	26	19	0	15	24	23	20	23	25	27	29
			30	31	38	36	35	32	22	13	0	14	21	22	23	25	27	28	29
			32	35	31	30	28	29	27	18	0	13	22	25	26	23	24	27	26
		Average	33	33.6	32.8	33	31.6	30.4	25	15.2	0	12	20.4	22.2	22.6	23	23.8	27.2	29.4
		SD	2.23607	2.40832	2.94958	3	3.04959	1.81659	2	3.11448	0	4.52769	4.82701	3.70135	2.60768	1.87083	2.58844	0.83666	2.30217

## Sheet: Figure 3-source data 3
These data were used to generate the graphs in figure 3 G.
Each raw represents one eye
		Outer nuclear layer	Normal light		High-intensity light
			Kit+/+	KitWps/Wps	Kit+/+	KitWps/Wps
		Number of TUNEL poitive cells/section	0	0	19	56
			0	0	21	52
			0	0	16	33
			0	0	29	49
			0	0	32	48
			0	0	36	39
			0	0	14	47
			0	0	19	31
			0	0	18	36
			0	0	21	55
		Average	0	0	22.5	44.6
		SD	0	0	7.29155	9.15545
