# Supplementary material for: KIT ligand protects against both light-induced and genetic photoreceptor degeneration
Source: eLife. 2020 Apr 3;9:e51698. doi: 10.7554/eLife.51698 (PMC7170656; doi:10.7554/eLife.51698)
Supplement: Figure 4—source data 1. [file elife-51698-fig4-data1.xlsx]

## Sheet: Figure 4-source data 1
These data were used to generate the graphs in figure 4 E.
Each raw represents one eye
Light	Virus type	ONL layer	Distance from optical nerve head (μm)
Condition			Inferior									Superior
			800	700	600	500	400	300	200	100	0	100	200	300	400	500	600	700	800
NL	No injection	Thickness (μm)	49	52	52	50	51	46	42	25	0	19	32	42	45	46	44	43	40
			48	52	53	51	49	48	39	22	0	18	29	42	46	48	43	45	41
			47	50	52	53	53	46	42	25	0	16	32	45	43	45	44	43	39
			52	53	51	48	52	45	46	28	0	22	36	40	45	46	46	42	41
		Average	49	51.75	52	50.5	51.25	46.25	42.25	25	0	18.75	32.25	42.25	44.75	46.25	44.25	43.25	40.25
		SD	2.16025	1.25831	0.816497	2.08167	1.70783	1.25831	2.87228	2.44949	0	2.5	2.87228	2.06155	1.25831	1.25831	1.25831	1.25831	0.957427
	AAV-CMV-empyt	Thickness (μm)	49	50	51	51	51	48	38	23	0	18	33	41	45	45	43	41	42
			51	53	51	52	50	49	41	28	0	19	36	43	41	45	45	43	39
			48	51	53	52	51	48	39	26	0	21	33	40	42	46	43	42	41
			52	52	48	54	50	46	42	22	0	18	34	42	41	43	42	41	42
		Average	50	51.5	50.75	52.25	50.5	47.75	40	24.75	0	19	34	41.5	42.25	44.75	43.25	41.75	41
		SD	1.82574	1.29099	2.06155	1.25831	0.57735	1.25831	1.82574	2.75379	0	1.41421	1.41421	1.29099	1.89297	1.25831	1.25831	0.957427	1.41421
	AAV-CMV-KITL	Thickness (μm)	46	47	49	50	49	51	40	23	0	19	33	41	42	45	39	41	40
			50	50	50	52	50	46	34	19	0	13	31	40	48	45	44	41	45
			49	51	52	52	51	48	37	28	0	17	30	38	44	48	46	42	43
			51	52	52	51	54	52	42	22	0	21	37	45	47	43	43	41	42
		Average	49	50	50.75	51.25	51	49.25	38.25	23	0	17.5	32.75	41	45.25	45.25	43	41.25	42.5
		SD	2.16025	2.16025	1.5	0.957427	2.16025	2.75379	3.5	3.74166	0	3.41565	3.0957	2.94392	2.75379	2.06155	2.94392	0.5	2.08167
LD	No injection	Thickness (μm)	29	29	27	29	28	29	28	23	0	21	19	20	24	21	20	15	20
			24	21	26	24	30	28	26	23	0	20	25	22	23	24	22	23	22
			23	23	26	28	29	31	25	19	0	22	22	22	24	23	22	23	24
			26	27	26	25	27	28	25	21	0	21	24	23	25	23	23	21	23
		Average	25.5	25	26.25	26.5	28.5	29	26	21.5	0	21	22.5	21.75	24	22.75	21.75	20.5	22.25
		SD	2.64575	3.65148	0.5	2.38048	1.29099	1.41421	1.41421	1.91485	0	0.816497	2.64575	1.25831	0.816497	1.25831	1.25831	3.78594	1.70783
	AAV-CMV-empyt	Thickness (μm)	26	24	24	26	24	24	25	13	0	13	25	24	24	24	25	22	22
			26	24	23	25	23	26	27	13	0	13	23	21	25	23	22	23	25
			23	24	25	28	26	27	24	15	0	14	26	23	24	22	24	22	25
			25	23	24	26	24	25	25	14	0	15	24	22	25	24	24	23	23
		Average	25	23.75	24	26.25	24.25	25.5	25.25	13.75	0	13.75	24.5	22.5	24.5	23.25	23.75	22.5	23.75
		SD	1.41421	0.5	0.816497	1.25831	1.25831	1.29099	1.25831	0.957427	0	0.957427	1.29099	1.29099	0.57735	0.957427	1.25831	0.57735	1.5
	AAV-CMV-KITL	Thickness (μm)	35	32	33	37	31	37	25	14	0	20	29	33	32	30	30	29	31
			31	29	32	31	39	35	26	23	0	9	32	35	35	32	31	30	30
			31	29	32	32	40	32	31	15	0	13	31	35	37	34	30	29	27
			32	30	27	35	35	35	32	13	0	14	39	34	36	32	32	29	30
		Average	32.25	30	31	33.75	36.25	34.75	28.5	16.25	0	14	32.75	34.25	35	32	30.75	29.25	29.5
		SD	1.89297	1.41421	2.70801	2.75379	4.11299	2.06155	3.51188	4.57347	0	4.54606	4.34933	0.957427	2.16025	1.63299	0.957427	0.5	1.73205

## Sheet: Figure 4-source data 2
These data were used to generate the graphs in Figure 4G.
Each raw represents one section
strain /condition	A field (63 × objective lens)		Cell death rate	Average	SD	Virus type
	TUNEL +	DAPI	B/C
Normal light	0	231	0	0	0	No injection
	0	266	0
	0	287	0
	0	301	0
	0	312	0
	0	276	0
	0	239	0	0.000597372	0.00146326	AAV8-CMV-empty
	0	301	0
	0	288	0
	1	279	0.00358423
	0	294	0
	0	266	0
	0	247	0	0.000582751	0.000582751	AAV8-CMV-KITL
	0	267	0
	0	234	0
	1	286	0.0034965
	0	303	0
	0	288	0
High intensity light	33	89	0.370787	0.376695	0.0499401	No injection
	37	95	0.389474
	46	112	0.410714
	30	107	0.280374
	40	96	0.416667
	40	102	0.392157
	35	85	0.411765	0.408077	0.0382784	AAV8-CMV-empty
	31	90	0.344444
	37	93	0.397849
	37	82	0.45122
	39	88	0.443182
	42	105	0.4
	16	155	0.103226	0.0912981	0.0155298	AAV8-CMV-KITL
	16	170	0.0941176
	12	145	0.0827586
	13	176	0.0738636
	15	189	0.0793651
	19	166	0.114458

## Sheet: Figure 4-source data 3
These data were used to generate the graphs in figure 4 I.
Each raw represents one eye
All mice were exposed to high-intensity light for 3 days.					Albino mice are Rpe65 wildtype and Tyrc/Tryc homozygous
Genotype	Virus type	Photoreceptor lay	Distance from optical nerve head (μm)
			Inferior													Superior
			1200	1100	1000	900	800	700	600	500	400	300	200	100	0	100	200	300	400	500	600	700	800	900	1000	1100	1200
Kit+/+ (albino)	AAV8-CMV-Empyt	Thickness (μm)	43	43	45	48	49	51	52	49	47	54	52	45	0	41	46	48	48	43	51	54	43	45	46	45	45
			41	51	47	48	52	58	54	56	52	54	48	39	0	49	51	52	47	48	54	55	56	58	47	49	48
			49	45	52	52	49	49	55	55	54	53	52	46	0	47	48	55	49	51	52	56	54	49	49	48	46
			49	53	55	53	54	56	56	55	56	53	52	49	0	43	44	48	46	49	50	52	53	50	47	46	44
		Average	45.5	48	49.75	50.25	51	53.5	54.25	53.75	52.25	53.5	51	44.75	0	45	47.25	50.75	47.5	47.75	51.75	54.25	51.5	50.5	47.25	47	45.75
		SD	4.12311	4.76095	4.57347	2.62996	2.44949	4.20317	1.70783	3.20156	3.86221	0.57735	2	4.19325	0	3.65148	2.98608	3.40343	1.29099	3.40343	1.70783	1.70783	5.8023	5.44671	1.25831	1.82574	1.70783
	AAV8-CMV-KITL	Thickness (μm)	68	62	63	69	62	61	62	77	66	61	53	43	0	45	62	59	64	68	62	63	66	62	66	64	65
			72	75	74	72	66	67	68	72	78	69	66	51	0	49	58	63	66	66	64	61	63	66	71	67	72
			63	65	68	62	76	73	73	71	65	72	62	54	0	46	61	66	62	62	68	66	74	68	61	62	61
			76	72	70	72	72	71	77	65	62	67	71	49	0	52	62	64	61	61	65	68	69	61	68	58	59
		Average	69.75	68.5	68.75	68.75	69	68	70	71.25	67.75	67.25	63	49.25	0	48	60.75	63	63.25	64.25	64.75	64.5	68	64.25	66.5	62.75	64.25
		SD	5.56028	6.02771	4.57347	4.71699	6.21825	5.2915	6.48074	4.92443	7.04154	4.64579	7.61577	4.64579	0	3.16228	1.89297	2.94392	2.21736	3.30404	2.5	3.10913	4.69042	3.30404	4.20317	3.77492	5.7373
KitWps/Wps (albino)	AAV8-CMV-Empyt	Thickness (μm)	35	37	38	38	38	42	43	41	38	37	34	17	0	18	28	32	31	36	38	31	33	34	38	39	38
			38	42	45	32	42	41	32	32	42	38	32	21	0	17	26	31	31	37	32	36	38	35	38	32	37
			31	38	36	41	31	37	36	38	32	32	33	18	0	22	24	26	35	33	37	38	39	37	32	33	36
			36	39	36	33	38	40	40	38	37	34	31	20	0	16	29	28	28	29	33	36	37	36	35	32	33
		Average	35	39	38.75	36	37.25	40	37.75	37.25	37.25	35.25	32.5	19	0	18.25	26.75	29.25	31.25	33.75	35	35.25	36.75	35.5	35.75	34	36
		SD	2.94392	2.16025	4.272	4.24264	4.57347	2.16025	4.78714	3.77492	4.11299	2.75379	1.29099	1.82574	0	2.62996	2.21736	2.75379	2.87228	3.59398	2.94392	2.98608	2.62996	1.29099	2.87228	3.3665	2.16025
	AAV8-CMV-KITL	Thickness (μm)	38	41	42	37	41	38	42	41	38	35	34	22	0	26	32	35	37	43	44	42	38	37	38	36	37
			38	36	41	38	37	41	38	37	38	37	31	19	0	28	34	32	35	41	38	39	37	36	38	36	32
			32	32	37	38	37	32	32	38	41	38	37	26	0	29	32	41	38	37	32	41	38	37	32	34	31
			35	38	39	39	38	37	35	39	38	39	32	22	0	24	33	36	39	33	38	37	37	35	37	35	33
		Average	35.75	36.75	39.75	38	38.25	37	36.75	38.75	38.75	37.25	33.5	22.25	0	26.75	32.75	36	37.25	38.5	38	39.75	37.5	36.25	36.25	35.25	33.25
		SD	2.87228	3.77492	2.21736	0.816497	1.89297	3.74166	4.272	1.70783	1.5	1.70783	2.64575	2.87228	0	2.21736	0.957427	3.74166	1.70783	4.43471	4.89898	2.21736	0.57735	0.957427	2.87228	0.957427	2.62996

## Sheet: Figure 4-source data 4
These data were used to generate the graphs in Figure 4J.
Each raw represents one section
All mice were exposed to high-intensity light for 3 days.
Albino mice are Rpe65 wildtype and Tyrc/Tryc homozygous
strain /condition	A field (63 × objective lens) at a distance of 300 μm from optic nerve head		Cell death rate	Average	SD	Virus type
	The number of TUNEL positive cells in the ONL	The number of DAPI positive cells in the ONL	B/C
Kit+/+ (albino)	34	112	0.303571	0.405862	0.0817577	AAV8-CMV-Flag
	42	98	0.428571
	44	88	0.5
	45	115	0.391304
	16	223	0.0717489	0.0894091	0.020674	AAV8-CMV-KITL
	16	178	0.0898876
	22	186	0.11828
	15	193	0.0777202
KitWps/Wps (albino)	44	65	0.676923	0.780553	0.114217	AAV8-CMV-Flag
	38	43	0.883721
	42	48	0.875
	46	67	0.686567
	28	33	0.848485	0.759019	0.0822514	AAV8-CMV-KITL
	38	48	0.791667
	43	58	0.741379
	36	55	0.654545
