# Supplementary material for: KIT ligand protects against both light-induced and genetic photoreceptor degeneration
Source: eLife. 2020 Apr 3;9:e51698. doi: 10.7554/eLife.51698 (PMC7170656; doi:10.7554/eLife.51698)
Supplement: Figure 5—figure supplement 1—source data 1. [file elife-51698-fig5-figsupp1-data1.xlsx]

## Sheet: source data 1
Figure 5-figure supplement 1 - Source Data 1
These data were used to generate the graphs in Figure 5-figure supplement 1 B.
Each raw represents one section
2-month old albino mice were exposed to normal light or high-intensity light for 3 days and then subjected to photoreceptor cell death assay
strain /condition	A field (63 × objective lens) at a distance of 300 μm from Optic nerve head		Cell death rate	Average	SD	Virus type
	Number of TUNEL+ cells in ONL	Number of DAPI+ cells in ONL	B/C
Normal light	0	265	0	0.000863184	0.00160333	AAV8-RPE65-Flag
	0	273	0
	0	306	0
	1	271	0.00369004
	0	248	0
	0	296	0
	1	311	0.00321543
	0	288	0
	1	278	0.00359712	0.000897669	0.00166216	AAV8-RPE65-KITL
	0	269	0
	0	288	0
	0	294	0
	0	308	0
	1	279	0.00358423
	0	312	0
	0	306	0
High intensity light	26	125	0.208	0.26581	0.0502623	AAV8-RPE65-Flag
	34	139	0.244604
	38	122	0.311475
	43	118	0.364407
	27	112	0.241071
	31	128	0.242188
	41	148	0.277027
	29	122	0.237705
	25	134	0.186567	0.217373	0.0284944	AAV8-RPE65-KITL
	33	142	0.232394
	32	138	0.231884
	28	147	0.190476
	24	122	0.196721
	28	143	0.195804
	31	118	0.262712
	32	132	0.242424

## Sheet: source data 2
Figure 5-figure supplement 1 source data 2
These data were used to generate the graphs in Figure 5-figure supplement 1 C.
Each raw represents one section
2-month old albino mice were exposed to normal light or high-intensity light for 3 days and then subjected to photoreceptor cell death assay
strain /condition	A field (63 × objective lens)		Cell death rate	Average	SD	Virus type
	Number of TUNEL + cells in ONL	Nmuber of DAPI+ cells in ONL	B/C
Normal light	0	277	0	0.000408497	0.0011554	AAV8-RHO-Flag
	0	298	0
	1	267	0
	0	312	0
	0	299	0
	0	285	0
	1	306	0.00326797
	0	284	0
	0	258	0	0.000432526	0.00122337	AAV8-RHO-KITL
	1	289	0.00346021
	0	293	0
	0	302	0
	0	284	0
	0	274	0
	0	279	0
	0	312	0
High intensity light	34	156	0.217949	0.259409	0.0468522	AAV8-RHO-Flag
	38	167	0.227545
	42	143	0.293706
	41	129	0.317829
	33	157	0.210191
	39	166	0.23494
	47	143	0.328671
	33	135	0.244444
	18	189	0.0952381	0.114602	0.0252511	AAV8-RHO-KITL
	22	194	0.113402
	28	188	0.148936
	19	202	0.0940594
	22	188	0.117021
	19	211	0.0900474
	20	196	0.102041
	27	173	0.156069
