# Supplementary material for: KIT ligand protects against both light-induced and genetic photoreceptor degeneration
Source: eLife. 2020 Apr 3;9:e51698. doi: 10.7554/eLife.51698 (PMC7170656; doi:10.7554/eLife.51698)
Supplement: Figure 5—source data 1. [file elife-51698-fig5-data1.xlsx]

## Sheet: Figure 5 source data 1
Figure 5-source data 1
These data were used to generate the graphs in figure 5 E .
Each raw represents one eye
Light Condition	Virus	Outer nuclear layer	Distance from optical nerve head (μm)
			Inferior									Superior
			800	700	600	500	400	300	200	100	0	100	200	300	400	500	600	700	800
Normal light (NL)	AAV8-RPE65-Flag	Thickness (μm)	39	41	44	46	47	45	40	18	0	14	36	43	43	39	36	34	36
			41	42	41	43	46	44	39	20	0	17	38	41	43	44	41	38	39
			41	39	43	46	47	46	42	22	0	21	40	45	44	42	44	41	38
			37	36	43	45	45	43	37	19	0	18	35	42	41	43	41	39	36
			40	41	42	41	44	45	42	23	0	15	34	42	41	42	41	36	37
		Average	39.6	39.8	42.6	44.2	45.8	44.6	40	20.4	0	17	36.6	42.6	42.4	42	40.6	37.6	37.2
		SD	1.67332	2.38747	1.14018	2.16795	1.30384	1.14018	2.12132	2.07364	0	2.73861	2.40832	1.51658	1.34164	1.87083	2.88097	2.70185	1.30384
	AAV8-RPE65-KITL	Thickness (μm)	40	41	43	42	45	47	42	22	0	19	45	42	41	39	37	38	38
			38	44	42	44	46	48	45	23	0	22	43	44	43	42	40	41	41
			41	44	43	45	47	45	41	19	0	18	38	43	44	42	41	40	39
			38	41	40	46	47	45	45	21	0	16	38	41	42	41	41	39	39
			37	41	43	45	48	47	42	22	0	20	41	43	45	45	42	41	41
		Average	38.8	42.2	42.2	44.4	46.6	46.4	43	21.4	0	19	41	42.6	43	41.8	40.2	39.8	39.6
		SD	1.64317	1.64317	1.30384	1.51658	1.14018	1.34164	1.87083	1.51658	0	2.23607	3.08221	1.14018	1.58114	2.16795	1.92354	1.30384	1.34164
High-intensity light (LD)	AAV8-RPE65-Flag	Thickness (μm)	24	25	26	27	27	31	26	19	0	17	21	32	29	28	22	22	20
			23	24	23	25	25	28	27	20	0	16	22	29	28	27	26	25	24
			21	24	24	28	30	29	28	18	0	19	23	28	29	28	25	24	24
			25	26	24	26	27	28	22	19	0	18	24	28	25	24	27	27	24
			21	24	26	23	26	27	29	21	0	20	28	24	25	26	25	21	21
		Average	22.8	24.6	24.6	25.8	27	28.6	26.4	19.4	0	18	23.6	28.2	27.2	26.6	25	23.8	22.6
		SD	1.78885	0.894427	1.34164	1.92354	1.87083	1.51658	2.70185	1.14018	0	1.58114	2.70185	2.86356	2.04939	1.67332	1.87083	2.38747	1.94936
	AAV8-RPE65-KITL	Thickness (μm)	24	26	28	28	27	31	30	19	0	18	32	31	28	29	23	24	21
			22	23	28	28	26	28	27	20	0	16	27	26	25	26	27	24	25
			26	25	26	28	31	28	29	22	0	14	29	28	28	28	24	23	24
			24	22	27	24	26	31	28	17	0	15	28	32	29	29	24	26	21
			24	24	25	27	28	29	31	18	0	20	28	29	29	26	23	22	25
		Average	24	24	26.8	27	27.6	29.4	29	19.2	0	16.6	28.8	29.2	27.8	27.6	24.2	23.8	23.2
		SD	1.41421	1.58114	1.30384	1.73205	2.07364	1.51658	1.58114	1.92354	0	2.40832	1.92354	2.38747	1.64317	1.51658	1.64317	1.48324	2.04939

## Sheet: Figure 5 source data 2
Figure 5-source data 2
These data were used to generate the graphs in figure 5J.
Each raw represents one eye
Light	Virus type	Outer nuclear layer	Distance from optical nerve head (μm)
Condition			Inferior									Superior
			800	700	600	500	400	300	200	100	0	100	200	300	400	500	600	700	800
Normal light (NL)	AAV8-RHO-Flag	Thickness (μm)	41	42	38	45	41	42	39	20	0	18	38	42	43	45	39	38	42
			43	44	42	41	42	44	41	22	0	17	36	45	41	42	44	42	41
			39	41	43	42	46	46	43	23	0	20	35	42	43	44	42	41	38
			40	42	41	43	42	46	41	20	0	18	33	41	44	41	42	41	39
			38	39	41	41	43	42	39	23	0	17	33	40	41	39	39	37	38
		Average	40.2	41.6	41	42.4	42.8	44	40.6	21.6	0	18	35	42	42.4	42.2	41.2	39.8	39.6
		SD	1.92354	1.81659	1.87083	1.67332	1.92354	2	1.67332	1.51658	0	1.22474	2.12132	1.87083	1.34164	2.38747	2.16795	2.16795	1.81659
	AAV8-RHO-KITL	Thickness (μm)	44	42	43	47	48	45	40	20	0	18	44	45	43	46	41	40	41
			39	41	44	42	46	47	48	22	0	15	40	42	47	44	43	42	44
			42	47	43	44	46	48	40	16	0	22	36	47	46	43	41	44	43
			45	43	45	46	43	46	46	23	0	14	33	44	42	41	42	43	41
			41	46	43	46	47	48	43	18	0	19	43	45	47	43	44	46	42
		Average	42.2	43.8	43.6	45	46	46.8	43.4	19.8	0	17.6	39.2	44.6	45	43.4	42.2	43	42.2
		SD	2.38747	2.58844	0.894427	2	1.87083	1.30384	3.57771	2.86356	0	3.20936	4.65833	1.81659	2.34521	1.81659	1.30384	2.23607	1.30384
High-intensity light (LD)	AAV8-RHO-Flag	Thickness (μm)	20	22	24	28	30	26	21	18	0	16	18	24	26	27	25	26	25
			24	25	23	26	27	28	25	16	0	15	22	26	28	26	25	27	24
			25	26	28	24	29	27	22	20	0	17	20	25	27	27	24	25	26
			27	24	23	26	28	29	23	18	0	18	21	26	25	24	26	23	24
			22	24	23	27	25	28	26	20	0	18	20	27	24	24	21	23	24
		Average	23.6	24.2	24.2	26.2	27.8	27.6	23.4	18.4	0	16.8	20.2	25.6	26	25.6	24.2	24.8	24.6
		SD	2.70185	1.48324	2.16795	1.48324	1.92354	1.14018	2.07364	1.67332	0	1.30384	1.48324	1.14018	1.58114	1.51658	1.92354	1.78885	0.894427
	AAV8-RHO-KITL	Thickness (μm)	32	30	31	34	34	34	31	16	0	14	33	34	35	32	31	29	30
			28	32	33	29	33	32	32	14	0	16	28	30	29	28	31	30	32
			29	30	29	31	29	30	28	15	0	16	27	29	30	29	29	33	31
			28	31	32	31	33	34	27	20	0	20	26	31	28	28	29	33	30
			31	33	32	29	32	31	27	18	0	14	26	31	33	31	32	31	32
		Average	29.6	31.2	31.4	30.8	32.2	32.2	29	16.6	0	16	28	31	31	29.6	30.4	31.2	31
		SD	1.81659	1.30384	1.51658	2.04939	1.92354	1.78885	2.34521	2.40832	0	2.44949	2.91548	1.87083	2.91548	1.81659	1.34164	1.78885	1
