# Supplementary material for: KIT ligand protects against both light-induced and genetic photoreceptor degeneration
Source: eLife. 2020 Apr 3;9:e51698. doi: 10.7554/eLife.51698 (PMC7170656; doi:10.7554/eLife.51698)
Supplement: Figure 8—source data 1. [file elife-51698-fig8-data1.xlsx]

## Sheet: Figure 8 resource data 1
Figure 8 - Source Data 1
These data were used to generate the graphs in figure 8D.
Each raw represents one eye
Scotopic condition (Flash light intensity at -5 log
scotopic candela-sec/m2)		Albino mice are Rpe65 wildtype and Tyrc/Tryc homozygous
strain /condition	Scotopic b wave (μV)		Genotype
	before LD	After LD
AAV-CMV-empyt	872	134	KitWps/Wps (Albino)
	724	200
	647	118
	812	171
	687	138
AAV-HMOX1	726	338
	842	389
	871	431
	741	341
	782	405

## Sheet: Figure 8 resource data 2
Figure 8 - Source Data 2
These data were used to generate the graphs in figure 8F.
Each raw represents one eye
Albino mice are Rpe65 wildtype and Tyrc/Tryc homozygous
Genotype	Virus type	Photoreceptor cell layer	Distance from optical nerve head (μm)
			Inferior													Superior
			1200	1100	1000	900	800	700	600	500	400	300	200	100	0	100	200	300	400	500	600	700	800	900	1000	1100	1200
KitWps/Wps (Albino)	AAV8-CMV-Empyt	Thickness (μm)	25	17	14	22	19	25	24	25	24	21	21	18	0	20	16	23	22	23	23	24	26	20	25	29	32
			21	17	16	14	21	21	23	26	21	18	19	18	0	15	17	15	21	18	23	20	23	18	19	23	27
			27	22	21	22	16	22	9	21	13	12	19	11	0	12	22	19	24	23	20	20	21	22	23	29	33
			17	15	21	20	17	20	14	18	10	15	13	18	0	15	16	15	17	23	21	18	21	26	21	31	31
			15	12	26	23	14	16	13	19	13	10	9	5	0	15	18	15	20	21	21	24	27	24	22	21	20
			20	21	23	23	23	21	23	21	18	18	20	15	0	24	30	28	26	27	19	21	19	25	23	25	32
		Average	20.8333	17.3333	20.1667	20.6667	18.3333	20.8333	17.6667	21.6667	16.5	15.6667	16.8333	14.1667	0	16.8333	19.8333	19.1667	21.6667	22.5	21.1667	21.1667	22.8333	22.5	22.1667	26.3333	29.1667
		SD	4.57894	3.7238	4.44597	3.4448	3.32666	2.92689	6.43946	3.20416	5.39444	4.13118	4.75044	5.26941	0	4.35507	5.45588	5.38207	3.14113	2.94958	1.60208	2.40139	3.12517	3.08221	2.04124	3.93277	4.95648
	AAV-CMV-HMOX1	Thickness (μm)	29	21	31	30	28	31	27	28	38	31	39	35	0	28	24	34	47	43	47	37	42	38	50	43	44
			32	34	24	32	33	25	40	36	26	26	31	22	0	22	33	43	52	36	38	40	37	39	38	42	37
			43	36	28	32	31	32	33	32	34	32	32	33	0	30	40	42	39	40	39	37	40	43	40	38	35
			35	29	27	25	28	25	24	27	27	28	27	28	0	28	33	43	51	46	42	45	40	48	47	37	38
			33	30	28	31	29	26	26	28	26	24	21	22	0	27	28	36	37	31	34	33	35	34	35	33	34
			23	25	28	21	23	28	23	27	28	23	29	28	0	28	23	24	32	41	46	39	44	44	42	39	37
		Average	32.5	29.1667	27.6667	28.5	28.6667	27.8333	28.8333	29.6667	29.8333	27.3333	29.8333	28	0	27.1667	30.1667	37	43	39.5	41	38.5	39.6667	41	42	38.6667	37.5
		SD	6.62571	5.56477	2.25093	4.50555	3.38625	3.0605	6.49359	3.61478	4.99667	3.6697	5.94699	5.4037	0	2.71416	6.43169	7.42967	8.17313	5.31977	4.97996	3.98748	3.26599	4.97996	5.62139	3.61478	3.50714
