# Supplementary material for: KIT ligand protects against both light-induced and genetic photoreceptor degeneration
Source: eLife. 2020 Apr 3;9:e51698. doi: 10.7554/eLife.51698 (PMC7170656; doi:10.7554/eLife.51698)
Supplement: Figure 9—figure supplement 1—source data 1. [file elife-51698-fig9-figsupp1-data1.xlsx]

## Sheet: s-Fig 9 source data 2
Figure 9-figure supplement 1- Source Data 2
These data were used to generate the graphs in figure 9-figure supplement 1D
Each raw represents one eye
Genotype	Virus type	Photoreceptor	Distance from optical nerve head (μm)
		cell layer	Inferior																		Superior
			1700	1600	1500	1400	1300	1200	1100	1000	900	800	700	600	500	400	300	200	100	0	100	200	300	400	500	600	700	800	900	1000	1100	1200	1300	1400	1500	1600	1700
rd1/rd1	AAV8-CMV-empyt	Thickness (μm)	43	41	46	40	39	38	40	42	36	41	33	36	33	36	35	33	33	0	33	28	32	30	27	33	36	30	31	33	29	31	32	32	32	48	43
			58	53	48	43	43	40	41	41	38	39	30	37	31	34	38	36	31	0	35	28	33	29	28	27	31	31	31	26	27	24	34	33	37	43	45
			43	46	42	39	38	37	42	39	42	34	40	35	34	38	37	36	26	0	31	27	39	36	33	34	33	36	32	27	31	31	29	33	32	34	38
			44	49	48	40	40	41	38	36	44	40	38	39	37	39	35	36	36	0	34	36	35	38	36	32	34	38	35	34	28	33	31	33	33	37	40
		Average	47	47.25	46	40.5	40	39	40.25	39.5	40	38.5	35.25	36.75	33.75	36.75	36.25	35.25	31.5	0	33.25	29.75	34.75	33.25	31	31.5	33.5	33.75	32.25	30	28.75	29.75	31.5	32.75	33.5	40.5	41.5
		SD	7.34847	5.058	2.82843	1.73205	2.16025	1.82574	1.70783	2.64575	3.65148	3.10913	4.57347	1.70783	2.5	2.21736	1.5	1.5	4.20317	0	1.70783	4.19325	3.0957	4.42531	4.24264	3.10913	2.08167	3.86221	1.89297	4.08248	1.70783	3.94757	2.08167	0.5	2.38048	6.245	3.10913
	AAV8-CMV-KITL	Thickness (μm)	38	33	34	38	38	31	26	32	35	34	35	35	37	32	31	32	29	0	31	31	34	30	32	35	34	31	35	31	31	33	31	27	30	31	36
			41	33	34	29	30	27	31	34	34	36	38	36	32	37	33	30	25	0	34	31	30	31	33	35	31	31	34	32	27	30	31	30	32	39	36
			44	39	37	36	34	32	32	31	31	29	33	35	31	31	28	35	31	0	29	30	33	29	29	33	33	33	31	28	25	26	25	29	29	31	31
			39	38	34	33	27	34	32	32	32	32	31	33	31	36	34	37	30	0	27	33	30	32	31	31	29	29	34	29	26	27	25	29	28	29	39
		Average	40.5	35.75	34.75	34	32.25	31	30.25	32.25	33	32.75	34.25	34.75	32.75	34	31.5	33.5	28.75	0	30.25	31.25	31.75	30.5	31.25	33.5	31.75	31	33.5	30	27.25	28.5	28	28.75	32.5	32.5	35.5
		SD	2.64575	3.20156	1.5	3.91578	4.78714	2.94392	2.87228	1.25831	1.82574	2.98608	2.98608	1.25831	2.87228	2.94392	2.64575	3.10913	2.62996	0	2.98608	1.25831	2.06155	1.29099	1.70783	1.91485	2.21736	1.63299	1.73205	1.82574	2.62996	3.16228	3.4641	1.25831	1.70783	4.43471	3.31662

## Sheet: s-Figure source data 3
Figure 9-figure supplement 1 source data 3
These data were used to generate the graphs in Figure-figure supplement 1E.
Each raw represents one section
Genotype	A field (40 × objective lens) at a distance of 300 μm from optic nerve head		Cell death rate	Average	SD	Virus type
	Number of TUNEL + cell in ONL	Number of DAPI+ cells in ONL	B/C
rd1/rd1	15	56	0.267857	0.218898	0.0422149	AAV8-CMV-empyt
	15	67	0.223881
	14	76	0.184211
	15	89	0.168539
	18	72	0.25
	14	126	0.111111	0.117504	0.0167778	AAV8-CMV-KITL
	17	145	0.117241
	19	133	0.142857
	17	142	0.119718
	17	176	0.0965909

## Sheet: s-Figure 9 source data 1
Figure 9-figure supplement 1 source data 1
These data were used to generate the graphs in Figure9-figure supplement 1B.
Each raw represents one eye
Scotopic condition (Flash light intensity at -5 log
scotopic candela-sec/m2)
strain /condition	Scotopic condition	Genotype
	b wave (μV)
AAV8-CMV-empyt	36	rd1/rd1
	53	rd1/rd1
	48	rd1/rd1
	53	rd1/rd1
	42	rd1/rd1
AAV8-CMV-KITL	18	rd1/rd1
	33	rd1/rd1
	23	rd1/rd1
	28	rd1/rd1
	22	rd1/rd1
