# Supplementary material for: KIT ligand protects against both light-induced and genetic photoreceptor degeneration
Source: eLife. 2020 Apr 3;9:e51698. doi: 10.7554/eLife.51698 (PMC7170656; doi:10.7554/eLife.51698)
Supplement: Figure 9—source data 1. [file elife-51698-fig9-data1.xlsx]

## Sheet: Figure 9 source data 1
Figure 9 - Source Data 1
These data were used to generate the graphs in figure 9C.
Each raw represents one eye
Genotype	Photoreceptor	Distance from optical nerve head (μm)
	layer	Inferior																Superior
		1500	1400	1300	1200	1100	1000	900	800	700	600	500	400	300	200	100	0	100	200	300	400	500	600	700	800	900	1000	1100	1200	1300	1400	1500
C57BL/6J	Thickness (μm)	70	69	79	78	84	88	82	94	81	91	83	92	89	67	47	0	59	75	79	79	78	83	82	77	75	73	71	71	69	65	67
		73	74	82	88	85	93	93	87	89	87	88	92	91	69	46	0	52	68	79	75	73	77	74	79	77	78	75	67	66	65	54
		76	68	75	81	85	81	83	86	84	85	82	81	78	74	43	0	53	71	74	76	78	78	75	73	72	75	64	66	64	58	49
		84	82	79	76	81	76	79	80	85	85	83	82	82	78	43	0	53	69	73	78	77	73	76	80	72	75	69	65	67	65	68
		61	63	70	70	72	77	77	77	79	78	82	79	79	70	43	0	48	72	85	78	83	82	80	80	75	72	78	75	67	74	73
		61	63	71	74	75	74	75	73	78	80	80	88	79	75	51	0	53	71	89	74	79	83	81	81	78	75	76	73	66	72	75
	Average	70.8333	69.8333	76	77.8333	80.3333	81.5	81.5	82.8333	82.6667	84.3333	83	85.6667	83	72.1667	45.5	0	53	71	79.8333	76.6667	78	79.3333	78	78.3333	74.8333	74.6667	72.1667	69.5	66.5	66.5	64.3333
	SD	8.93122	7.25029	4.81664	6.21021	5.57375	7.50333	6.37966	7.62671	4.13118	4.71876	2.68328	5.75036	5.62139	4.16733	3.20936	0	3.52136	2.44949	6.21021	1.96638	3.2249	4.0332	3.40588	2.94392	2.48328	2.06559	5.19294	4.08656	1.64317	5.75326	10.5008
rd10/rd10 injected with AAV8-CMV-empyt	Thickness (μm)	18	12	12	15	16	14	14	17	23	18	18	16	16	15	10	0	10	12	17	18	18	15	15	17	12	15	13	14	19	11	14
		23	12	15	17	18	15	16	17	15	21	18	18	17	14	8	0	11	13	20	20	19	18	13	15	12	13	13	17	14	15	19
		26	15	18	17	19	14	18	15	19	17	14	17	17	16	12	0	11	16	19	19	17	18	12	11	14	16	13	18	14	16	18
		24	23	16	14	17	18	16	16	23	21	17	18	15	18	15	0	12	16	22	21	23	18	19	13	13	12	16	18	12	12	14
		22	19	13	16	17	15	19	18	18	19	22	19	19	15	11	0	11	14	18	16	16	12	16	13	14	12	11	15	15	10	11
		25	18	14	15	16	15	15	17	21	21	20	19	18	19	11	0	11	14	16	19	18	15	17	16	15	14	13	15	15	11	13
	Average	23	16.5	14.6667	15.6667	17.1667	15.1667	16.3333	16.6667	19.8333	19.5	18.1667	17.8333	17	16.1667	11.1667	0	11	14.1667	18.6667	18.8333	18.5	16	15.3333	14.1667	13.3333	13.6667	13.1667	16.1667	14.8333	12.5	14.8333
	SD	2.82843	4.32435	2.16025	1.21106	1.16905	1.47196	1.8619	1.0328	3.12517	1.76068	2.71416	1.16905	1.41421	1.94079	2.31661	0	0.632456	1.60208	2.16025	1.7224	2.42899	2.44949	2.58199	2.2286	1.21106	1.63299	1.60208	1.7224	2.31661	2.42899	3.0605
rd10/rd10 injected with AAV8-CMV-KITL	Thickness (μm)	43	46	46	45	48	56	54	61	61	61	62	62	62	65	47	0	48	51	51	50	54	47	46	47	44	38	36	42	38	37	36
		45	46	48	48	51	51	53	56	52	61	60	63	69	65	47	0	50	58	54	54	52	44	42	43	45	39	37	44	40	33	35
		31	46	48	45	43	48	46	45	47	45	38	44	47	39	32	0	39	45	43	51	46	47	42	43	39	30	38	40	37	39	43
		50	51	63	57	58	51	48	34	49	45	43	53	33	34	34	0	38	41	45	44	43	40	44	38	41	48	41	40	40	38	43
		45	46	44	47	50	59	55	57	60	59	61	62	61	60	46	0	49	53	50	51	47	46	45	47	49	38	36	41	33	34	34
		37	41	45	45	47	49	55	57	57	59	61	61	61	64	51	0	47	52	51	53	49	43	42	46	41	36	40	43	30	39	43
	Average	41.8333	46	49	47.8333	49.5	52.3333	51.8333	51.6667	54.3333	55	54.1667	57.5	55.5	54.5	42.8333	0	45.1667	50	49	50.5	48.5	44.5	43.5	44	43.1667	38.1667	38	41.6667	36.3333	36.6667	39
	SD	6.76511	3.16228	7.04273	4.66548	5.00999	4.27395	3.86868	10.1915	5.85377	7.79744	10.7223	7.55645	13.1415	14.1527	7.83369	0	5.26941	6.0663	4.14729	3.50714	4.03733	2.73861	1.76068	3.4641	3.60093	5.81091	2.09762	1.63299	4.0332	2.58199	4.42719

## Sheet: Figure 9 source data 2
Figure 9 source data 2
These data were used to generate the graphs in Figure 9E.
Each raw represents one section
Genotype	A field (40 × objective lens) at a distance of 300 μm from optic nerve head		Cell death rate	Average	SD	Virus type
	TUNEL +	DAPI	B/C
C57BL/6J	0	385	0	0	0	No infection
	0	422	0
	0	411	0
	0	396	0
	0	377	0
rd10/rd10	15	83	0.180723	0.16234	0.0204015	AAV8-CMV-empyt
	15	85	0.176471
	14	105	0.133333
	15	87	0.172414
	18	121	0.14876
	14	155	0.0903226	0.0891485	0.0155316	AAV8-CMV-KITL
	17	178	0.0955056
	19	175	0.108571
	16	242	0.0661157
	15	176	0.0852273

## Sheet: Figure 9 source data 3
Figure 9 - Source Data 3
These data were used to generate the graphs in figure 9G.
Each raw represents one eye
strain /condition	Scotopic condition (Flash light intensity at -5 log scotopic candela-sec/m2)		Genotype
	a wave (μV)	b wave (μV)
No infection	232.7	666.3	C57BL/6J
	317.3	711.1	C57BL/6J
	324.8	689.1	C57BL/6J
	325.6	659.2	C57BL/6J
	279.4	800.5	C57BL/6J
	415.7	650.9	C57BL/6J
	272.7	521.1	C57BL/6J
	264.3	729.7	C57BL/6J
	378.4	567.2	C57BL/6J
	256.6	721	C57BL/6J
	371.8	722.7	C57BL/6J
AAV8-CMV-empyt	79.7	113.4	rd10/rd10
	89	147	rd10/rd10
	68.2	210.2	rd10/rd10
	43.7	144.3	rd10/rd10
	63.8	96.1	rd10/rd10
AAV8-CMV-KITL	144.8	317.9	rd10/rd10
	113.3	333.5	rd10/rd10
	128.7	266.8	rd10/rd10
	109	277.3	rd10/rd10
	136.2	324.8	rd10/rd10
